# Supplementary material for: Inflammation and the Incidence of Type 2 Diabetes: The Multi-Ethnic Study of Atherosclerosis (MESA)
Source: PubMed Central journal article supplement — Diabetes Care. 2010 Jan 22;33(4):804–10. doi: 10.2337/dc09-1679 (PMC2845031; doi:10.2337/dc09-1679), 2010-01-22
Supplement: supp_dc09-1679_dc09-1679_online_appendix.pdf [file supp_dc09-1679_dc09-1679_online_appendix.pdf]

## Appendix

Spearman Correlations between continuous variables and inflammatory proteins, the Multi-Ethnic Study of Atherosclerosis 2000-2007.

| Variable                 | CRP   | IL-6  | Fibrinogen |
|--------------------------|-------|-------|------------|
| Age                      | 0.05  | 0.20  | 0.17       |
| Body Mass Index          | 0.41  | 0.37  | 0.24       |
| Systolic Blood Pressure  | 0.14  | 0.18  | 0.11       |
| Diastolic Blood Pressure | -0.01 | 0.01  | -0.03      |
| Glucose                  | 0.09  | 0.16  | 0.09       |
| HOMA-IR                  | 0.20  | 0.25  | 0.14       |
| Exercise Met-min/wk      | -0.09 | -0.12 | -0.08      |
| Pack-years smoking       | 0.07  | 0.11  | -0.01      |
| C-reactive protein       | ---   | 0.53  | 0.47       |
| Interleukin-6            | 0.53  | ---   | 0.42       |
| Fibrinogen               | 0.47  | 0.42  | ----       |

CRP is C-Reactive Protein, IL-6 is Interleukin-6.
